# Supplementary material for: Organic Thermoelectric Multilayers with High Stretchiness
Source: MDPI journal article supplement (doi:10.3390/nano10010041), 2019-12-23
Supplement: s1 [file s1]

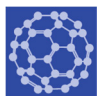

## Supporting Information

## Organic Thermoelectric Multilayers with High Stretchiness

Chungyeon Cho <sup>1,\*</sup> and Jihun Son <sup>1</sup>

Department of Carbon Convergence Engineering, College of Engineering, Wonkwang University, Iksan 54538, Jeonbuk, Korea; sjhoon14@wku.ac.kr

\* Correspondence: cncho37@wku.ac.kr; Tel.: +82-63-850-7274

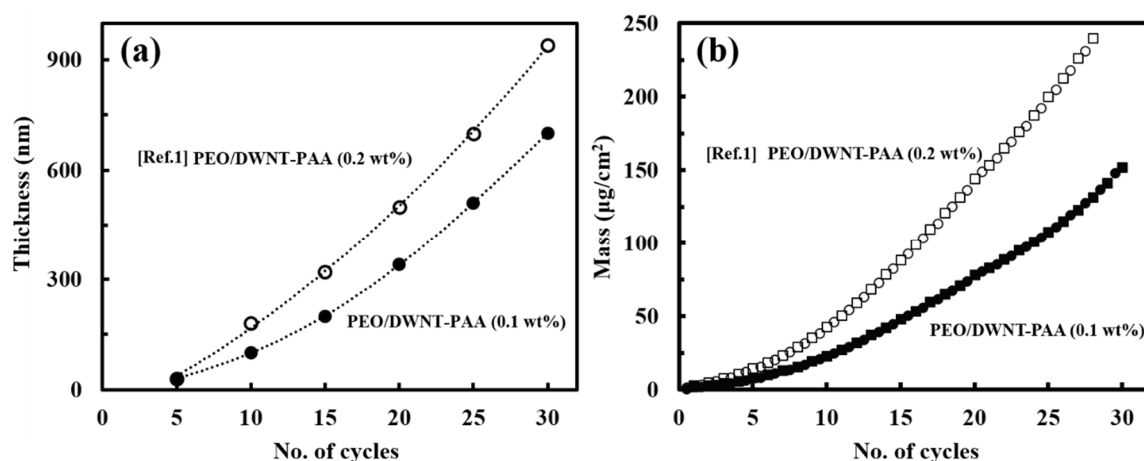

**Figure S1.** (a) Thickness and (b) mass of PEO/DWNT-PAA bilayer systems with different concentrations of PAA (0.1 and 0.2 wt%) as a function of deposition cycles.

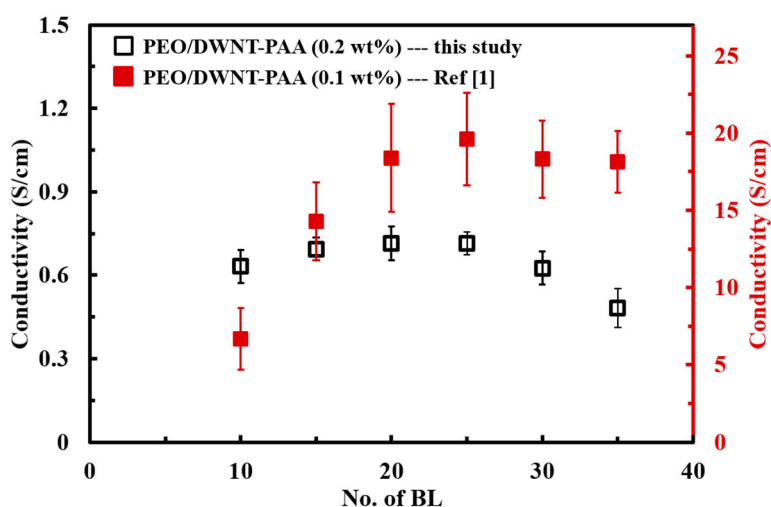

**Figure S2.** Electrical conductivity of PEO/DWNT-PAA assembled with 0.1 (filled square) and 0.2 (open square) wt% as a function of bilayers deposited.

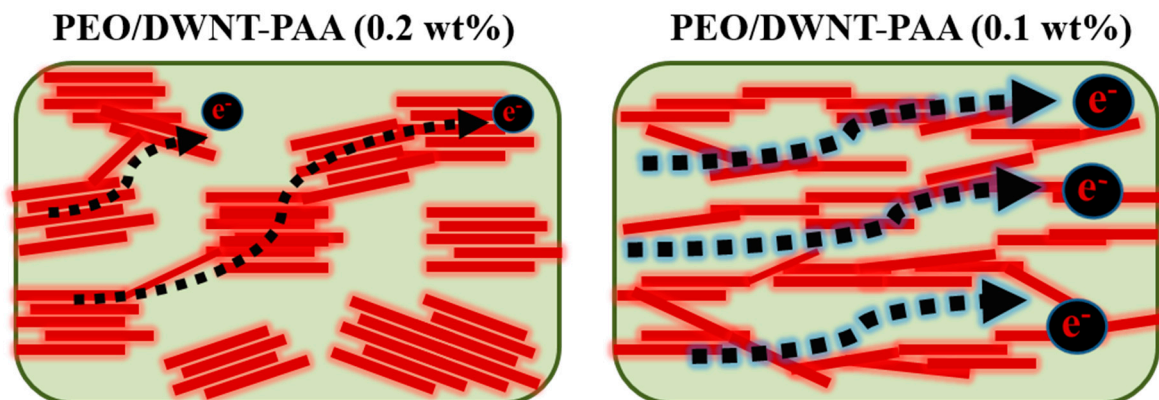

**Figure S3.** Schematics of carrier transport across the nanotubes in the PEO/DWNT-PAA nanocomposites where DWNT is dispersed with 0.1 and 0.2 wt% PAA, respectively.

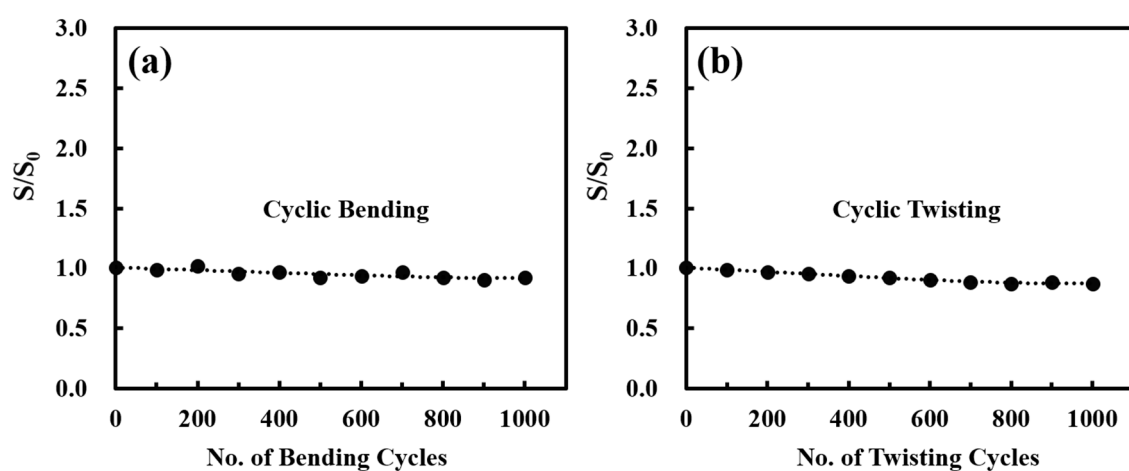

**Figure S4.** Normalized Seebeck coefficient of  $\sim 500$  nm thick 25 bilayer of PEO/DWNT-PAA in cyclic (a) bending and (b) twisting tests.

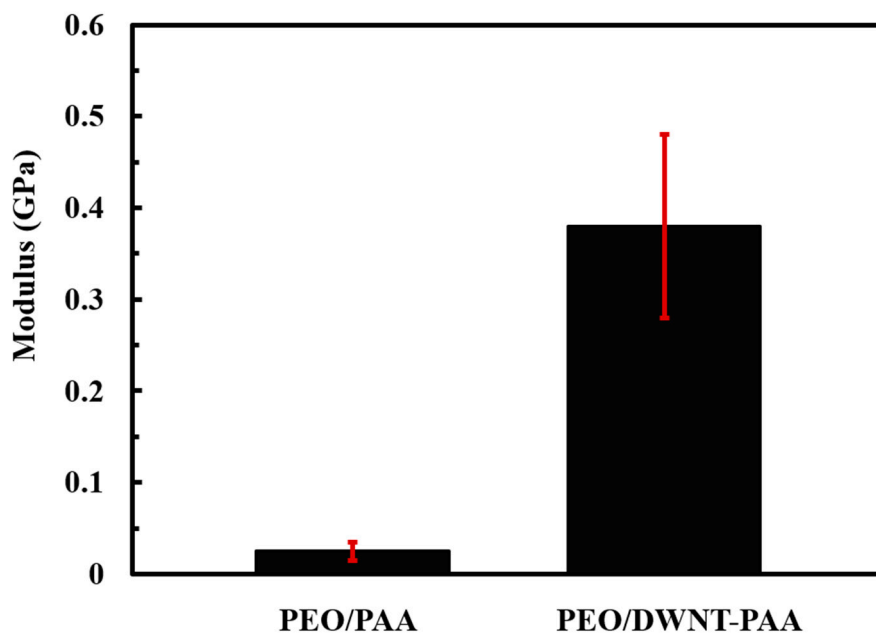

**Figure S5.** Elastic modulus of 25 bilayer PEO/PAA BL and PEO/DWNT-PAA films deposited on a Si-wafer.

**References**

1. C. Cho, Y. Song, R. Allen, K.L. Wallace, J.C. Grunlan, Stretchable electrically conductive and high gas barrier nanocomposites, *Journal of Materials Chemistry C* 6(8) (2018) 2095-2104.
